# Supplementary material for: Retinal Pigment Epithelium Expressed Toll-like Receptors and Their Potential Role in Age-Related Macular Degeneration
Source: Int J Mol Sci. 2021 Aug 4;22(16):8387. doi: 10.3390/ijms22168387 (PMC8395065; doi:10.3390/ijms22168387)
Supplement: Supplementary file 1 [file ijms-22-08387-s001.zip › ijms-1297953-supplementary.pdf]

## Supplemental

**Table S1.** List of included studies

| Authors          | Titel                                                                                                                                                                       | Journal                                              |
|------------------|-----------------------------------------------------------------------------------------------------------------------------------------------------------------------------|------------------------------------------------------|
| Allikmets et al. | Geographic atrophy in age-related macular degeneration and TLR3.                                                                                                            | N Engl J Med. 2009 May 21;360(21):2252-4.            |
| Brosig et al.    | Gene expression regulation in retinal pigment epithelial cells induced by viral RNA and viral/bacterial DNA.                                                                | Mol Vis. 2015 Aug 31;21:1000-16.                     |
| Chen et al.      | Wogonin protects human retinal pigment epithelium cells from LPS-induced barrier dysfunction and inflammatory responses by regulating the TLR4/NF-kappaB signaling pathway. | Mol Med Rep. 2017 Apr;15(4):2289-2295.               |
| Chen et al.      | TLR4 inhibitor attenuates amyloid-beta-induced angiogenic and inflammatory factors in ARPE-19 cells: Implications for age-related macular degeneration.                     | Mol Med Rep. 2016 Apr;13(4):3249-56.                 |
| Chintala et al.  | Activation of TLR3 promotes the degeneration of retinal ganglion cells by upregulating the protein levels of JNK3.                                                          | Invest Ophthalmol Vis Sci. 2015 Jan 6;56(1):505-14.  |
| Cho et al.       | Toll-like receptor polymorphisms and age-related macular degeneration: replication in three case-control samples.                                                           | Invest Ophthalmol Vis Sci. 2009 Dec;50(12):5614-8.   |
| Crowley et al.   | Induction of Ocular Complement Activation by Inflammatory Stimuli and Intraocular Inhibition of Complement Factor D in Animal Models.                                       | Invest Ophthalmol Vis Sci. 2018 Feb 1;59(2):940-951. |
| Cheng et al.     | Toll-like receptor 3 polymorphism is not associated with neovascular age-related                                                                                            | Genet Mol Res. 2014 Jan 17;13(1):302-9.              |

---

|                 |                                                                                                                                                                                       |                                                     |
|-----------------|---------------------------------------------------------------------------------------------------------------------------------------------------------------------------------------|-----------------------------------------------------|
|                 | macular degeneration and polypoidal choroidal vasculopathy in the Chinese.                                                                                                            |                                                     |
| Despriet et al. | Comprehensive analysis of the candidate genes CCL2, CCR2, and TLR4 in age-related macular degeneration.                                                                               | Invest Ophthalmol Vis Sci. 2008 Jan;49(1):364-71.   |
| Dietrich et al. | Interaction of inflammatorily activated retinal pigment epithelium with retinal microglia and neuronal cells.                                                                         | Exp Eye Res. 2020 Oct;199:108167.                   |
| Duncan et al.   | Repeat exposure to polyinosinic:polycytidylic acid induces TLR3 expression via JAK-STAT signaling and synergistically potentiates NFκB-RelA signaling in ARPE-19 cells.               | Cell Signal. 2020 Feb;66:109494.                    |
| Ebihara et al.  | Distinct functions between toll-like receptors 3 and 9 in retinal pigment epithelial cells                                                                                            | Ophthalmic Res. 2007;39(3):155-63.                  |
| Edwards et al.  | Toll-like receptor polymorphisms and age-related macular degeneration.                                                                                                                | Invest Ophthalmol Vis Sci. 2008 Apr;49(4):1652-9.   |
| Edwards et al.  | Geographic atrophy in age-related macular degeneration and TLR3.                                                                                                                      | N Engl J Med. 2009 May 21;360(21):2254-5.           |
| Elner et al.    | TLR4 mediates human retinal pigment epithelial endotoxin binding and cytokine expression                                                                                              | Trans Am Ophthalmol Soc . 2005;103:126-35.          |
| Feng et al.     | A Proinflammatory Function of Toll-Like Receptor 2 in the Retinal Pigment Epithelium as a Novel Target for Reducing Choroidal Neovascularization in Age-Related Macular Degeneration. | Am J Pathol. 2017 Oct;187(10):2208-2221.            |
| Fujimoto et al. | Choroidal neovascularization enhanced by Chlamydia pneumoniae via Toll-like receptor 2 in the retinal pigment                                                                         | Invest Ophthalmol Vis Sci. 2010 Sep;51(9):4694-702. |

---

---

|                   |                                                                                                       |                |                            |  |
|-------------------|-------------------------------------------------------------------------------------------------------|----------------|----------------------------|--|
|                   | epithelium.                                                                                           |                |                            |  |
| Gounarides et al. | Lack of involvement of CEP adducts in TLR activation and in angiogenesis.                             | PLoS One.      | 2014 Oct 24;9(10):e111472. |  |
| Güven et al.      | Toll-Like Receptors 2 and 4 Polymorphisms in Age-Related Macular Degeneration.                        | Curr Eye Res.  | 2016 Jun;41(6):856-61.     |  |
| Grunwald et.      | Growth of geographic atrophy in the comparison of age-related macular degeneration treatments trials. | Ophthalmology. | 2015 Apr;122(4):809-16     |  |

---

|                 |                                                                                                                                                                                 |                                   |                                 |  |
|-----------------|---------------------------------------------------------------------------------------------------------------------------------------------------------------------------------|-----------------------------------|---------------------------------|--|
| Hettich et al.  | The retinal pigment epithelium (RPE) induces FasL and reduces iNOS and Cox2 in primary monocytes.                                                                               | Graefes Arch Clin Exp Ophthalmol. | 2014 Nov;252(11):1747-54.       |  |
| Huang et al.    | 7-Ketocholesterol-induced inflammation signals mostly through the TLR4 receptor both in vitro and in vivo.                                                                      | PLoS One.                         | 2014 Jul 18;9(7):e100985.       |  |
| Kaur et al.     | Analysis of CFH, TLR4, and APOE polymorphism in India suggests the Tyr402His variant of CFH to be a global marker for age-related macular degeneration.                         | Invest Ophthalmol Vis Sci.        | 2006 Sep;47(9):3729-35.         |  |
| Klein et al.    | Progression of geographic atrophy and genotype in age-related macular degeneration.                                                                                             | J. Ophthalmology.                 | 2010 Aug;117(8):1554-9, 1559.e1 |  |
| Kleinman et al. | Sequence- and target-independent angiogenesis suppression by siRNA via TLR3.                                                                                                    | Nature.                           | 2008 Apr 3;452(7187):591-7.     |  |
| Kleinman et al. | Short-interfering RNAs induce retinal degeneration via TLR3 and IRF3.                                                                                                           | J. Mol Ther.                      | 2012 Jan;20(1):101-8.           |  |
| Klettner et al. | Toll-like receptor 3 activation in retinal pigment epithelium cells - Mitogen-activated protein kinase pathways of cell death and vascular endothelial growth factor secretion. | Acta Ophthalmol.                  | 2013 May;91(3):e211-8           |  |

---

---

|                    |                                                                                                                                                     |                                                                    |
|--------------------|-----------------------------------------------------------------------------------------------------------------------------------------------------|--------------------------------------------------------------------|
| Klettner et al.    | Retinal pigment epithelium cells alter the pro-inflammatory response of retinal microglia to TLR-3 stimulation.                                     | Acta Ophthalmol. 2014 Dec;92(8):e621-9.                            |
| Klettner et al.    | Effect of long-term inflammation on viability and function of RPE cells.                                                                            | Exp Eye Res. 2020 Nov;200:108214. doi: 10.1016/j.exer.2020.108214. |
| Kohno et al.       | Photoreceptor proteins initiate microglial activation via Toll-like receptor 4 in retinal degeneration mediated by all-trans-retinal.               | J Biol Chem. 2013 May 24;288(21):15326-41.                         |
| Kindzelskii et al. | Toll-Like Receptor 4 (TLR4) of Retinal Pigment Epithelial Cells Participates in Transmembrane Signaling in Response to Photoreceptor Outer Segments | J Gen Physiol . 2004 Aug;124(2):139-49.                            |
| Lewin              | Geographic atrophy in age-related macular degeneration and TLR3.                                                                                    | N Engl J Med. 2009 May 21;360(21):2251; author reply 2255-6.       |
| Liew et al.        | Geographic atrophy in age-related macular degeneration and TLR3.                                                                                    | N Engl J Med. 2009 May 21;360(21):2252; author reply 2255-6.       |
| Ling et al.        | Associations of TLR4 gene polymorphisms with the risk of age-related macular degeneration in a Chinese Han population.                              | Medicine (Baltimore). 2019 May;98(19):e15583.                      |
| Liu et al.         | Toll-like receptor 4 gene polymorphisms rs4986790 and rs4986791 and age-related macular degeneration susceptibility: a meta-analysis.               | Ophthalmic Genet. 2020 Feb;41(1):31-35.                            |
| Ma et al.          | Association of toll-like receptor 3 polymorphism rs3775291 with age-related macular degeneration: a systematic review and meta-analysis.            | Sci Rep. 2016 Jan 22;6:19718.                                      |
| Maloney et al.     | Choroidal neovascular membranes express toll-like receptor 3.                                                                                       | Jr. Ophthalmic Res. 2010;44(4):237-41.                             |

---

|                 |                                                                                                                                                           |                                            |
|-----------------|-----------------------------------------------------------------------------------------------------------------------------------------------------------|--------------------------------------------|
| Mulfaul et al.  | Toll-Like Receptors and Age-Related Macular Degeneration.                                                                                                 | Adv Exp Med Biol. 2018;1074:19-28.         |
| Mulfaul et al.  | Toll-like Receptor 2 Facilitates Oxidative Damage-Induced Retinal Degeneration.                                                                           | Cell Rep. 2020 Feb 18;30(7):2209-2224.e5.  |
| Murakami et al. | Programmed necrosis, not apoptosis, is a key mediator of cell loss and DAMP-mediated inflammation in dsRNA-induced retinal degeneration                   | Cell Death Differ . 2014 Feb;21(2):270-7.  |
| Paimela et al.  | The effect of 17beta-estradiol on IL-6 secretion and NF-kappaB DNA-binding activity in human retinal pigment epithelial cells.                            | Immunol Lett. 2007 Jun 15;110(2):139-44.   |
| Patel et al.    | Toll-like receptor 3 (TLR3) protects retinal pigmented epithelium (RPE) cells from oxidative stress through a STAT3-dependent mechanism.                  | Mol Immunol. 2013 Jun;54(2):122-31.        |
| Patel et al.    | A novel protective role for the innate immunity Toll-Like Receptor 3 (TLR3) in the retina via Stat3.                                                      | Mol Cell Neurosci. 2014 Nov;63:38-48.      |
| Saeed et al.    | The oxidative stress product carboxyethylpyrrole potentiates TLR2/TLR1 inflammatory signaling in macrophages.                                             | PLoS One. 2014 Sep 3;9(9):e106421          |
| Sharma et al.   | Does toll-like receptor-3 (TLR-3) have any role in Indian AMD phenotype?                                                                                  | Mol Cell Biochem. 2014 Aug;393(1-2):1-8.   |
| Shiose et al.   | Toll-like receptor 3 is required for development of retinopathy caused by impaired all-trans-retinal clearance in mice.                                   | J Biol Chem. 2011 Apr 29;286(17):15543-55. |
| Sng et al.      | Toll-like receptor 3 polymorphism rs3775291 is not associated with choroidal neovascularization or polypoidal choroidal vasculopathy in Chinese subjects. | Ophthalmic Res. 2011;45(4):191-6.          |
| Stewart et al.  | Expression of Toll-like receptors                                                                                                                         | Exp Eye Res. 2015                          |

---

|                    |                                                                                                                             |                                                           |
|--------------------|-----------------------------------------------------------------------------------------------------------------------------|-----------------------------------------------------------|
|                    | in human retinal and choroidal vascular endothelial cells.                                                                  | Sep;138:114-23.                                           |
| Terheyden et al.   | Basolateral activation with TLR agonists induces polarized cytokine release and reduces barrier function in RPE in vitro    | Graefes Arch Clin Exp Ophthalmol. 2021 Feb;259(2):413-424 |
| Wang et al.        | Detection and biological activities of carboxyethylpyrrole ethanolamine phospholipids (CEP-EPs).                            | Chem Res Toxicol. 2014 Dec 15;27(12):2015-22.             |
| Will-Orrego et al. | Amount of Mononuclear Phagocyte Infiltrate Does Not Predict Area of Experimental Choroidal Neovascularization (CNV).        | J Ocul Pharmacol Ther. 2018 Sep;34(7):489-499.            |
| Wörnle et al.      | Inhibition of TLR3-mediated proinflammatory effects by Alkylphosphocholines in human retinal pigment epithelial cells.      | Invest Ophthalmol Vis Sci. 2011 Aug 17;52(9):6536-44      |
| Yang et al.        | IL-10 is significantly involved in HSP70-regulation of experimental subretinal fibrosis.                                    | PLoS One. 2013 Dec 20;8(12):e80288.                       |
| Yang et al.        | Toll-like receptor 3 and geographic atrophy in age-related macular degeneration.                                            | N Engl J Med. 2008 Oct 2;359(14):1456-63.                 |
| Zareparsari et al. | Toll-like receptor 4 variant D299G is associated with susceptibility to age-related macular degeneration.                   | Hum Mol Genet. 2005 Jun 1;14(11):1449-55.                 |
| Zhou et al.        | Association study of toll-like receptors 4 polymorphisms and the risk of age-related macular degeneration: a meta-analysis. | Ophthalmic Genet. 2020 Dec;41(6):579-584.                 |
| Zhou et al.        | Toll-like receptor 3 C1234T may protect against geographic atrophy through decreased dsRNA binding capacity.                | FASEB J. 2011 Oct;25(10):3489-95.                         |
| Zhu et al.         | Increase in peripheral blood mononuclear cell Toll-like receptor 2/3 expression and reactivity to their ligands in a        | Mol Vis. 2013 Aug 6;19:1826-33                            |

---

---

|             |                                                                             |     |      |      |     |  |
|-------------|-----------------------------------------------------------------------------|-----|------|------|-----|--|
|             | cohort of patients with wet age-related macular degeneration.               |     |      |      |     |  |
| Zhu et al.. | C5a and toll-like receptor 4 crosstalk in retinal pigment epithelial cells. | Mol | Vis. | 2015 | Sep |  |
|             | 29;21:1122-9.                                                               |     |      |      |     |  |

---

---
